# Supplementary material for: Lower Extremity Amputation and Peripheral Revascularisation Rates in Romania and Their Relationship with Comorbidities and Vascular Care
Source: MDPI journal article supplement (doi:10.3390/jcm13010052), 2023-12-21
Supplement: s1 [file s1]

Table S1: RO-DRG v1. procedure codes

| No.                                 | Code   | Procedure                                                                            |
|-------------------------------------|--------|--------------------------------------------------------------------------------------|
| <b>Revascularization procedures</b> |        |                                                                                      |
| 1                                   | H15103 | Percutaneous transluminal balloon angioplasty with stenting, single stent            |
| 2                                   | H15104 | Percutaneous transluminal balloon angioplasty with stenting, multiple stents         |
| 3                                   | H15101 | Percutaneous transluminal balloon angioplasty                                        |
| 4                                   | H10013 | Embolectomy or thrombectomy of femoral artery, unilateral                            |
| 5                                   | H10014 | Embolectomy or thrombectomy of popliteal artery, unilateral                          |
| 6                                   | H10502 | Patch graft of artery using synthetic material                                       |
| 7                                   | H11021 | Femoro-popliteal bypass using synthetic material, above knee anastomosis, unilateral |
| 8                                   | H10012 | Embolectomy or thrombectomy of iliac artery, unilateral                              |
| 9                                   | H10015 | Embolectomy or thrombectomy of tibial artery, unilateral                             |
| 10                                  | H10501 | Patch graft of artery using autologous material                                      |
| 11                                  | H10102 | Embolectomy or thrombectomy of bypass graft of artery of extremities                 |
| 12                                  | H12801 | Procurement of vein from limb for bypass or replacement graft, unilateral            |
| 13                                  | H10016 | Embolectomy or thrombectomy of other artery                                          |
| 14                                  | H11009 | Aorto-femoro-femoral bypass using synthetic material                                 |
| 15                                  | H11022 | Femoro-popliteal bypass using synthetic material, below knee anastomosis, unilateral |
| 16                                  | H11012 | Iliofemoral bypass using synthetic material                                          |
| 17                                  | H10911 | Femoro-popliteal bypass using vein, above knee anastomosis                           |
| 18                                  | H09901 | Endarterectomy in conjunction with arterial bypass to prepare site for anastomosis   |
| 19                                  | H11008 | Aorto-femoral bypass using synthetic material                                        |
| 20                                  | H15004 | Excision of bypass graft from limb                                                   |
| 21                                  | H10912 | Femoro-popliteal bypass using vein, below knee anastomosis                           |
| 22                                  | H11025 | Other arterial bypass graft using synthetic material                                 |
| 23                                  | H10915 | Other arterial bypass using vein                                                     |
| 24                                  | H11102 | Femoro-femoral crossover bypass                                                      |
| 25                                  | H10913 | Femoral to proximal tibial or peroneal artery bypass using vein                      |
| 26                                  | H10101 | Embolectomy or thrombectomy of bypass graft of artery of trunk                       |
| 27                                  | H10922 | Popliteal-tibial bypass using vein                                                   |
| 28                                  | H11010 | Aorto-iliac bypass using synthetic material                                          |
| 29                                  | H15106 | Open transluminal balloon angioplasty with stenting, multiple stents                 |
| 30                                  | H11015 | Axillo-femoral bypass using synthetic material                                       |
| 31                                  | H15102 | Open transluminal balloon angioplasty                                                |
| 32                                  | H10914 | Femoral to distal tibial or peroneal artery bypass using vein                        |
| 33                                  | H11016 | Axillo-femoro-femoral bypass using synthetic material                                |
| 34                                  | H11011 | Aorto-ilio-femoral bypass using synthetic material                                   |
| 35                                  | H11101 | Iliofemoral crossover bypass                                                         |
| 36                                  | H11105 | Femoral to tibial or peroneal artery bypass using composite graft, unilateral        |
| 37                                  | H15201 | Percutaneous peripheral laser angioplasty                                            |

|                       |        |                                                                                           |
|-----------------------|--------|-------------------------------------------------------------------------------------------|
| 38                    | H10906 | Iliofemoral bypass using vein                                                             |
| 39                    | H15105 | Open transluminal balloon angioplasty with stenting, single stent                         |
| 40                    | H11023 | Femoral to proximal tibial or peroneal artery bypass using synthetic material, unilateral |
| 41                    | H11107 | Femoral artery sequential bypass using synthetic material, unilateral                     |
| 42                    | H11034 | Aorto-femoro-popliteal bypass using synthetic material                                    |
| 43                    | H11024 | Femoral to distal tibial or peroneal artery bypass using synthetic material, unilateral   |
| 44                    | H11106 | Femoral artery sequential bypass using vein, unilateral                                   |
| 45                    | H11036 | Popliteal-tibial bypass using synthetic material                                          |
| 46                    | H11104 | Femoro-popliteal bypass using composite graft, below knee anastomosis, unilateral         |
| 47                    | H15202 | Open peripheral laser angioplasty                                                         |
| 48                    | H10920 | Aorto-femoro-popliteal bypass using vein                                                  |
| 49                    | H11014 | Subclavian-femoro-femoral bypass using synthetic material                                 |
| 50                    | H11035 | Ilio-iliac bypass using synthetic material                                                |
| 51                    | H11103 | Femoro-popliteal bypass using composite graft, above knee anastomosis, unilateral         |
| 52                    | H13304 | Sapheno-femoral vein cross leg bypass                                                     |
| 53                    | H15003 | Excision of axillo-femoral or femoro-femoral bypass graft                                 |
| 54                    | H10921 | Ilio-iliac bypass using vein                                                              |
| 55                    | H11013 | Subclavian-femoral bypass using synthetic material                                        |
| 56                    | H11026 | Aorto-subclavian bypass using synthetic material                                          |
| 57                    | H13303 | Sapheno-iliac vein cross leg bypass                                                       |
| Amputation procedures |        |                                                                                           |
| 58                    | O11601 | Amputation above knee                                                                     |
| 59                    | O16301 | Amputation of toe, unilateral                                                             |
| 60                    | O16302 | Amputation of toe including metatarsal bone, unilateral                                   |
| 61                    | O16306 | Transmetatarsal amputation, unilateral                                                    |
| 62                    | O13603 | Amputation below knee                                                                     |
| 63                    | O19307 | Reamputation of amputation stump, unilateral                                              |
| 64                    | O16305 | Midtarsal amputation, unilateral                                                          |
| 65                    | O11602 | Amputation at hip                                                                         |
| 66                    | O16304 | Amputation of ankle through malleoli of tibia and fibula, unilateral                      |

Table S2. –ICD-10-AM3 diagnosis codes

| No.          | ICD-10-AM3 code | Diagnosis                                                                      |
|--------------|-----------------|--------------------------------------------------------------------------------|
| Risk factors |                 |                                                                                |
| 1            | E09.01          | Glucose intolerance regulation with peripheric angiopathy without gangrene     |
| 2            | E09.02          | Glucose intolerance regulation with peripheric angiopathy with gangrene        |
| 3            | E10.11          | Type 1 diabetes mellitus with acidocetosis, without coma                       |
| 4            | E10.12          | Type 1 diabetes mellitus with acidocetosis, with coma                          |
| 5            | E10.13          | Type 1 diabetes mellitus with lactic acidosis, without coma                    |
| 6            | E10.14          | Type 1 diabetes mellitus with lactic acidosis, with coma                       |
| 7            | E10.15          | Type 1 diabetes mellitus with ketoacidosis, with lactic acidosis, without coma |

|    |        |                                                                                                   |
|----|--------|---------------------------------------------------------------------------------------------------|
| 8  | E10.16 | Type 1 diabetes mellitus with ketoacidosis, with lactic acidosis, with coma                       |
| 9  | E10.21 | Type 1 diabetes mellitus with incipient diabetic nephropathy                                      |
| 10 | E10.22 | Type 1 diabetes mellitus with established or advanced kidney disease                              |
| 11 | E10.23 | Type 1 diabetes mellitus with end stage renal disease                                             |
| 12 | E10.29 | Type 1 diabetes mellitus with other specified kidney complication                                 |
| 13 | E10.31 | Type 1 diabetes mellitus with background retinopathy                                              |
| 14 | E10.32 | Type 1 diabetes mellitus with preproliferative retinopathy                                        |
| 15 | E10.33 | Type 1 diabetes mellitus with proliferative retinopathy                                           |
| 16 | E10.34 | Type 1 diabetes mellitus with other retinopathy                                                   |
| 17 | E10.35 | Type 1 diabetes mellitus with advanced ophthalmic disease                                         |
| 18 | E10.36 | Type 1 diabetes mellitus with diabetic cataract                                                   |
| 19 | E10.39 | Type 1 diabetes mellitus with other specified ophthalmic complication                             |
| 20 | E10.40 | Type 1 diabetes mellitus with unspecified neuropathy                                              |
| 21 | E10.41 | Type 1 diabetes mellitus with mononeuropathy                                                      |
| 22 | E10.42 | Type 1 diabetes mellitus with polyneuropathy                                                      |
| 23 | E10.43 | Type 1 diabetes mellitus with autonomic neuropathy                                                |
| 24 | E10.49 | Type 1 diabetes mellitus with specified neurologic complications                                  |
| 25 | E10.51 | Type 1 diabetes mellitus with peripheral angiopathy, without gangrene                             |
| 26 | E10.52 | Type 1 diabetes mellitus with peripheral angiopathy with gangrene                                 |
| 27 | E10.53 | Type 1 diabetes mellitus with ischemic diabetic cardiopathy                                       |
| 28 | E10.61 | Type 1 diabetes mellitus with musculoskeletal and connective tissue complication                  |
| 29 | E10.62 | Type 1 diabetes mellitus with skin and subcutaneous tissue complication                           |
| 30 | E10.63 | Type 1 diabetes mellitus with periodontal complication                                            |
| 31 | E10.64 | Type 1 diabetes mellitus with hypoglycaemia                                                       |
| 32 | E10.65 | Type 1 diabetes mellitus with poor control                                                        |
| 33 | E10.69 | Type 1 diabetes mellitus with other specified complication                                        |
| 34 | E10.71 | Type 1 diabetes mellitus with multiple microvascular complications                                |
| 35 | E10.73 | Type 1 diabetes mellitus with foot ulcer, multiple causes                                         |
| 36 | E10.8  | Type 1 diabetes mellitus with unspecified complications                                           |
| 37 | E10.9  | Type 1 diabetes mellitus without complications                                                    |
| 38 | E11.01 | Type 2 diabetes mellitus with hyperosmolarity without noncetotic hiperglicaemic-hiperosmotic coma |
| 39 | E11.02 | Type 2 diabetes mellitus with hyperosmotic coma                                                   |
| 40 | E11.11 | Type 2 diabetes mellitus with ketoacidosis, without coma                                          |
| 41 | E11.12 | Type 2 diabetes mellitus with ketoacidosis, with coma                                             |
| 42 | E11.13 | Type 2 diabetes mellitus with lactic acidosis, without coma                                       |
| 43 | E11.14 | Type 2 diabetes mellitus with lactic acidosis, with coma                                          |
| 44 | E11.15 | Type 2 diabetes mellitus with ketoacidosis, with lactic acidosis, without coma                    |
| 45 | E11.16 | Type 2 diabetes mellitus with ketoacidosis, with lactic acidosis, with coma                       |
| 46 | E11.21 | Type 2 diabetes mellitus with incipient diabetic nephropathy                                      |
| 47 | E11.22 | Type 2 diabetes mellitus with established or advanced kidney disease                              |

|    |        |                                                                                                              |
|----|--------|--------------------------------------------------------------------------------------------------------------|
| 48 | E11.23 | Type 2 diabetes mellitus with end stage renal disease                                                        |
| 49 | E11.29 | Type 2 diabetes mellitus with other specified kidney complication                                            |
| 50 | E11.31 | Type 2 diabetes mellitus with background retinopathy                                                         |
| 51 | E11.32 | Type 2 diabetes mellitus with preproliferative retinopathy                                                   |
| 52 | E11.33 | Type 2 diabetes mellitus with proliferative retinopathy                                                      |
| 53 | E11.34 | Type 2 diabetes mellitus with other retinopathy                                                              |
| 54 | E11.35 | Type 2 diabetes mellitus with advanced ophthalmic disease                                                    |
| 55 | E11.36 | Type 2 diabetes mellitus with diabetic cataract                                                              |
| 56 | E11.39 | Type 2 diabetes mellitus with other specified ophthalmic complication                                        |
| 57 | E11.40 | Type 2 diabetes mellitus with unspecified neuropathy                                                         |
| 58 | E11.41 | Type 2 diabetes mellitus with mononeuropathy                                                                 |
| 59 | E11.42 | Type 2 diabetes mellitus with polyneuropathy                                                                 |
| 60 | E11.43 | Type 2 diabetes mellitus with autonomic neuropathy                                                           |
| 61 | E11.49 | Type 2 diabetes mellitus with specified neurologic complications                                             |
| 62 | E11.51 | Type 2 diabetes mellitus with peripheral angiopathy, without gangrene                                        |
| 63 | E11.52 | Type 2 diabetes mellitus with peripheral angiopathy with gangrene                                            |
| 64 | E11.53 | Type 2 diabetes mellitus with ischemic diabetic cardiopathy                                                  |
| 65 | E11.61 | Type 2 diabetes mellitus with musculoskeletal and connective tissue complication                             |
| 66 | E11.62 | Type 2 diabetes mellitus with skin and subcutaneous tissue complication                                      |
| 67 | E11.63 | Type 2 diabetes mellitus with periodontal complication                                                       |
| 68 | E11.64 | Type 2 diabetes mellitus with hypoglycaemia                                                                  |
| 69 | E11.65 | Type 2 diabetes mellitus with poor control                                                                   |
| 70 | E11.69 | Type 2 diabetes mellitus with other specified complication                                                   |
| 71 | E11.71 | Type 2 diabetes mellitus with multiple microvascular complications                                           |
| 72 | E11.72 | Type 2 diabetes mellitus with resistance to insulin                                                          |
| 73 | E11.73 | Type 2 diabetes mellitus with foot ulcer, multiple causes                                                    |
| 74 | E11.8  | Type 2 diabetes mellitus with unspecified complications                                                      |
| 75 | E11.9  | Type 2 diabetes mellitus without complications                                                               |
| 76 | E13.01 | Other specified diabetes mellitus with hyperosmolarity, without noncetotic hyperglycemic - hyperosmotic coma |
| 77 | E13.02 | Other specified diabetes mellitus with hyperosmolarity, with coma                                            |
| 78 | E13.11 | Other specified diabetes mellitus with ketoacidosis, without coma                                            |
| 79 | E13.12 | Other specified diabetes mellitus with ketoacidosis, with coma                                               |
| 80 | E13.13 | Other specified diabetes mellitus with lactic acidosis, without coma                                         |
| 81 | E13.14 | Other specified diabetes mellitus with lactic acidosis, with coma                                            |
| 82 | E13.15 | Other specified diabetes mellitus with ketoacidosis, with lactic acidosis, without coma                      |
| 83 | E13.16 | Other specified diabetes mellitus with ketoacidosis, with lactic acidosis, with coma                         |
| 84 | E13.21 | Other specified diabetes mellitus with incipient diabetic nephropathy                                        |
| 85 | E13.22 | Other specified diabetes mellitus with established or advanced kidney disease                                |
| 86 | E13.23 | Other specified diabetes mellitus with end stage renal disease                                               |
| 87 | E13.29 | Other specified diabetes mellitus with other specified kidney complication                                   |

|     |        |                                                                                                         |
|-----|--------|---------------------------------------------------------------------------------------------------------|
| 88  | E13.31 | Other specified diabetes mellitus with background retinopathy                                           |
| 89  | E13.32 | Other specified diabetes mellitus with preproliferative retinopathy                                     |
| 90  | E13.33 | Other specified diabetes mellitus with proliferative retinopathy                                        |
| 91  | E13.34 | Other specified diabetes mellitus with other retinopathy                                                |
| 92  | E13.35 | Other specified diabetes mellitus with advanced ophthalmic disease                                      |
| 93  | E13.36 | Other specified diabetes mellitus with diabetic cataract                                                |
| 94  | E13.39 | Other specified diabetes mellitus with other specified ophthalmic complication not elsewhere classified |
| 95  | E13.40 | Other specified diabetes mellitus with diabetic neuropathy, unspecified                                 |
| 96  | E13.41 | Other specified diabetes mellitus with mononeuropathy                                                   |
| 97  | E13.42 | Other specified diabetes mellitus with polyneuropathy                                                   |
| 98  | E13.43 | Other specified diabetes mellitus with autonomic neuropathy                                             |
| 99  | E13.49 | Other specified diabetes mellitus with other diabetic neurological complication                         |
| 100 | E13.51 | Other specified diabetes mellitus with peripheral angiopathy without gangrene                           |
| 101 | E13.52 | Other specified diabetes mellitus with peripheral angiopathy with gangrene                              |
| 102 | E13.53 | Other specified diabetes mellitus with diabetic ischemic cardiomyopathy                                 |
| 103 | E13.61 | Other specified diabetes mellitus with musculoskeletal and connective tissue complication               |
| 104 | E13.62 | Other specified diabetes mellitus with skin and subcutaneous tissue complication                        |
| 105 | E13.63 | Other specified diabetes mellitus with periodontal complication                                         |
| 106 | E13.64 | Other specified diabetes mellitus with hypoglycaemia                                                    |
| 107 | E13.65 | Other specified diabetes mellitus with poor control, so described                                       |
| 108 | E13.69 | Other specified diabetes mellitus with other specified complication, not elsewhere classified           |
| 109 | E13.71 | Other specified diabetes mellitus with multiple microvascular complications                             |
| 110 | E13.72 | Other specified diabetes mellitus with insuline resistency                                              |
| 111 | E13.73 | Other specified diabetes mellitus with foot ulcer due to multiple causes                                |
| 112 | E13.8  | Other specified diabetes mellitus with unspecified complications                                        |
| 113 | E13.9  | Other specified diabetes mellitus without complications                                                 |
| 114 | E14.01 | Unspecified diabetes mellitus with                                                                      |
| 115 | E14.02 | Unspecified diabetes mellitus with with hiperosmolarity and coma                                        |
| 116 | E14.11 | Unspecified diabetes mellitus with ketoacidosis without coma                                            |
| 117 | E14.12 | Unspecified diabetes mellitus with ketoacidosis with coma                                               |
| 118 | E14.13 | Unspecified diabetes mellitus with lactic acidosis without coma                                         |
| 119 | E14.14 | Unspecified diabetes mellitus with lactic acidosis with coma                                            |
| 120 | E14.15 | Unspecified diabetes mellitus with ketoacidosis with lactic acidosis without coma                       |
| 121 | E14.16 | Unspecified diabetes mellitus with ketoacidosis with lactic acidosis with coma                          |
| 122 | E14.21 | Unspecified diabetes mellitus with incipient diabetic nephropathy                                       |
| 123 | E14.22 | Unspecified diabetes mellitus with established kidney disease                                           |
| 124 | E14.23 | Unspecified diabetes mellitus with end stage kidney disease                                             |
| 125 | E14.29 | Unspecified diabetes mellitus with other specified kidney complication not elsewhere classified         |
| 126 | E14.31 | Unspecified diabetes mellitus with background retinopathy                                               |

|     |        |                                                                                                     |
|-----|--------|-----------------------------------------------------------------------------------------------------|
| 127 | E14.32 | Unspecified diabetes mellitus with preproliferative retinopathy                                     |
| 128 | E14.33 | Unspecified diabetes mellitus with proliferative retinopathy                                        |
| 129 | E14.34 | Unspecified diabetes mellitus with other retinopathy                                                |
| 130 | E14.35 | Unspecified diabetes mellitus with advanced ophthalmic disease                                      |
| 131 | E14.36 | Unspecified diabetes mellitus with diabetic cataracta                                               |
| 132 | E14.39 | Unspecified diabetes mellitus with other specified ophthalmic complication not elsewhere classified |
| 133 | E14.40 | Unspecified diabetes mellitus with unspecified neuropathy                                           |
| 134 | E14.41 | Unspecified diabetes mellitus with mononeuropathy                                                   |
| 135 | E14.42 | Unspecified diabetes mellitus with polyneuropathy                                                   |
| 136 | E14.43 | Unspecified diabetes mellitus with autonomic neuropathy                                             |
| 137 | E14.49 | Unspecified diabetes mellitus with other specified neurologic complications                         |
| 138 | E14.51 | Unspecified diabetes mellitus with peripheral angiopathy without gangrene                           |
| 139 | E14.52 | Unspecified diabetes mellitus with peripheral angiopathy with gangrene                              |
| 140 | E14.53 | Unspecified diabetes mellitus with diabetic ischemic cardiomyopathy                                 |
| 141 | E14.61 | Unspecified diabetes mellitus with musculoskeletal and connective tissue complication               |
| 142 | E14.62 | Unspecified diabetes mellitus with skin and subcutaneous tissue complication                        |
| 143 | E14.63 | Unspecified diabetes mellitus with periodontal complication                                         |
| 144 | E14.64 | Unspecified diabetes mellitus with hypoglycaemia                                                    |
| 145 | E14.65 | Unspecified diabetes mellitus with poor control, so described                                       |
| 146 | E14.69 | Unspecified diabetes mellitus with other specified complication, not elsewhere classified           |
| 147 | E14.71 | Unspecified diabetes mellitus with multiple microvascular complications                             |
| 148 | E14.72 | Unspecified diabetes mellitus with insulin resistancy                                               |
| 149 | E14.73 | Unspecified diabetes mellitus with foot ulcer due to multiple causes                                |
| 150 | E14.8  | Unspecified diabetes mellitus with unspecified complications                                        |
| 151 | E14.9  | Unspecified diabetes mellitus without complications                                                 |
| 152 | E24.4  | Alcohol-induced pseudo-Cushing's syndrome                                                           |
| 153 | E66.0  | Obesity due to excess calories                                                                      |
| 154 | E66.1  | Drug-induced obesity                                                                                |
| 155 | E66.2  | Extreme obesity with alveolar hypoventilation                                                       |
| 156 | E66.8  | Other obesity                                                                                       |
| 157 | E66.9  | Obesity, unspecified                                                                                |
| 158 | E67.8  | Other specified hyperalimentation                                                                   |
| 159 | E75.5  | Other lipid storage disorders                                                                       |
| 160 | E75.6  | Lipid storage disorder, unspecified                                                                 |
| 161 | E78.0  | Pure hypercholesterolaemia                                                                          |
| 162 | E78.2  | Mixed hyperlipidaemia                                                                               |
| 163 | E78.4  | Other hyperlipidaemia                                                                               |
| 164 | E78.5  | Hyperlipidaemia, unspecified                                                                        |
| 165 | F10.0  | Mental and behavioural disorders due to use of alcohol, acute intoxication                          |

|     |        |                                                                                                     |
|-----|--------|-----------------------------------------------------------------------------------------------------|
| 166 | F10.1  | Mental and behavioural disorders due to use of alcohol, harmful use                                 |
| 167 | F10.2  | Mental and behavioural disorders due to use of alcohol, dependence syndrome                         |
| 168 | F10.3  | Mental and behavioural disorders due to use of alcohol, withdrawal state                            |
| 169 | F10.4  | Mental and behavioural disorders due to use of alcohol, withdrawal state with delirium              |
| 170 | F10.5  | Mental and behavioural disorders due to use of alcohol, psychotic disorder                          |
| 171 | F10.6  | Mental and behavioural disorders due to use of alcohol, amnesic syndrome                            |
| 172 | F10.7  | Mental and behavioural disorders due to use of alcohol, residual and late-onset psychotic disorder  |
| 173 | F10.8  | Mental and behavioural disorders due to use of alcohol, other mental and behavioural disorders      |
| 174 | F10.9  | Mental and behavioural disorders due to use of alcohol, unspecified mental and behavioural disorder |
| 175 | F17.0  | Mental and behavioural disorders due to use of tobacco, acute intoxication                          |
| 176 | F17.1  | Mental and behavioural disorders due to use of tobacco, harmful use                                 |
| 177 | F17.2  | Mental and behavioural disorders due to use of tobacco, dependence syndrome                         |
| 178 | F17.3  | Mental and behavioural disorders due to use of tobacco, withdrawal state                            |
| 179 | F17.4  | Mental and behavioural disorders due to use of tobacco, withdrawal state with delirium              |
| 180 | F17.5  | Mental and behavioural disorders due to use of tobacco, psychotic disorder                          |
| 181 | F17.6  | Mental and behavioural disorders due to use of tobacco, amnesic syndrome                            |
| 182 | F17.7  | Mental and behavioural disorders due to use of tobacco, residual and late-onset psychotic disorder  |
| 183 | F17.8  | Mental and behavioural disorders due to use of tobacco, other mental and behavioural disorders      |
| 184 | F17.9  | Mental and behavioural disorders due to use of tobacco, unspecified mental and behavioural disorder |
| 185 | F50.4  | Overeating associated with other psychological disturbances                                         |
| 186 | G31.2  | Degeneration of nervous system due to alcohol                                                       |
| 187 | G45.1  | Carotid artery syndrome (hemispheric)                                                               |
| 188 | G45.2  | Multiple and bilateral precerebral artery syndromes                                                 |
| 189 | G45.8  | Other transient cerebral ischaemic attacks and related syndromes                                    |
| 190 | G45.9  | Transient cerebral ischaemic attack, unspecified                                                    |
| 191 | G46.3* | Brain stem stroke syndrome (I60-I67+)                                                               |
| 192 | G46.8* | Other vascular syndromes of brain in cerebrovascular diseases (I60-I67+)                            |
| 193 | G62.1  | Alcoholic polyneuropathy                                                                            |
| 194 | G72.1  | Alcoholic myopathy                                                                                  |
| 195 | I10    | Essential (primary) hypertension                                                                    |
| 196 | I11.0  | Hypertensive heart disease with (congestive) heart failure                                          |
| 197 | I11.9  | Hypertensive heart disease without (congestive) heart failure                                       |
| 198 | I12.0  | Hypertensive renal disease with renal failure                                                       |
| 199 | I12.9  | Hypertensive renal disease without renal failure                                                    |
| 200 | I13.0  | Hypertensive heart and renal disease with (congestive) heart failure                                |
| 201 | I13.1  | Hypertensive heart and renal disease with renal failure                                             |

|     |        |                                                                                             |
|-----|--------|---------------------------------------------------------------------------------------------|
| 202 | I13.2  | Hypertensive heart and renal disease with both (congestive) heart failure and renal failure |
| 203 | I13.9  | Hypertensive heart and renal disease, unspecified                                           |
| 204 | I15.0  | Renovascular hypertension                                                                   |
| 205 | I15.1  | Hypertension secondary to other renal disorders                                             |
| 206 | I15.2  | Hypertension secondary to endocrine disorders                                               |
| 207 | I15.8  | Other secondary hypertension                                                                |
| 208 | I15.9  | Secondary hypertension, unspecified                                                         |
| 209 | I24.0  | Coronary thrombosis not resulting in myocardial infarction                                  |
| 210 | I25.11 | Atherosclerotic heart disease of native coronary artery                                     |
| 211 | I25.4  | Coronary artery aneurysm                                                                    |
| 212 | I42.6  | Alcoholic cardiomyopathy                                                                    |
| 213 | I63.0  | Cerebral infarction due to thrombosis of precerebral arteries                               |
| 214 | I63.1  | Cerebral infarction due to embolism of precerebral arteries                                 |
| 215 | I63.2  | Cerebral infarction due to unspecified occlusion or stenosis of precerebral arteries        |
| 216 | I63.3  | Cerebral infarction due to thrombosis of cerebral arteries                                  |
| 217 | I63.4  | Cerebral infarction due to embolism of cerebral arteries                                    |
| 218 | I63.5  | Cerebral infarction due to unspecified occlusion or stenosis of cerebral arteries           |
| 219 | I63.6  | Cerebral infarction due to cerebral venous thrombosis, nonpyogenic                          |
| 220 | I63.8  | Other cerebral infarction                                                                   |
| 221 | I63.9  | Cerebral infarction, unspecified                                                            |
| 222 | I64    | Stroke, not specified as haemorrhage or infarction                                          |
| 223 | I65.0  | Occlusion and stenosis of vertebral artery                                                  |
| 224 | I65.1  | Occlusion and stenosis of basilar artery                                                    |
| 225 | I65.2  | Occlusion and stenosis of carotid artery                                                    |
| 226 | I65.3  | Occlusion and stenosis of multiple and bilateral precerebral arteries                       |
| 227 | I65.8  | Occlusion and stenosis of other precerebral artery                                          |
| 228 | I65.9  | Occlusion and stenosis of unspecified precerebral artery                                    |
| 229 | I66.0  | Occlusion and stenosis of middle cerebral artery                                            |
| 230 | I66.1  | Occlusion and stenosis of anterior cerebral artery                                          |
| 231 | I66.2  | Occlusion and stenosis of posterior cerebral artery                                         |
| 232 | I66.3  | Occlusion and stenosis of cerebellar arteries                                               |
| 233 | I66.4  | Occlusion and stenosis of multiple and bilateral cerebral arteries                          |
| 234 | I66.8  | Occlusion and stenosis of other cerebral artery                                             |
| 235 | I66.9  | Occlusion and stenosis of unspecified cerebral artery                                       |
| 236 | I67.4  | Hypertensive encephalopathy                                                                 |
| 237 | I67.8  | Other specified cerebrovascular diseases                                                    |
| 238 | I67.9  | Cerebrovascular disease, unspecified                                                        |
| 239 | I68.8* | Other cerebrovascular disorders in diseases classified elsewhere                            |
| 240 | I69.3  | Sequelae of cerebral infarction                                                             |
| 241 | I69.4  | Sequelae of stroke, not specified as haemorrhage or infarction                              |



|     |        |                                                                                          |
|-----|--------|------------------------------------------------------------------------------------------|
| 242 | I69.8  | Sequelae of other and unspecified cerebrovascular diseases                               |
| 243 | I70.0  | Atherosclerosis of aorta                                                                 |
| 244 | I70.20 | Atherosclerosis of arteries of extremities without gangrene                              |
| 245 | I70.21 | Atherosclerosis of arteries of extremities with gangrene                                 |
| 246 | I70.22 | Atherosclerosis of native arteries of extremities with rest pain                         |
| 247 | I70.23 | Atherosclerosis of native arteries of right leg with ulceration                          |
| 248 | I70.24 | Atherosclerosis of arteries of extremities with gangrene                                 |
| 249 | I70.8  | Atherosclerosis of other arteries                                                        |
| 250 | I70.9  | Generalized and unspecified atherosclerosis                                              |
| 251 | I73.0  | Raynaud's syndrome                                                                       |
| 252 | I73.1  | Thromboangiitis obliterans [Buerger]                                                     |
| 253 | I73.8  | Other specified peripheral vascular diseases                                             |
| 254 | I73.9  | Peripheral vascular disease, unspecified                                                 |
| 255 | I74.0  | Embolism and thrombosis of abdominal aorta                                               |
| 256 | I74.1  | Embolism and thrombosis of other and unspecified parts of aorta                          |
| 257 | I74.2  | Embolism and thrombosis of arteries of upper extremities                                 |
| 258 | I74.3  | Embolism and thrombosis of arteries of lower extremities                                 |
| 259 | I74.4  | Embolism and thrombosis of arteries of extremities, unspecified                          |
| 260 | I74.5  | Embolism and thrombosis of Iliac artery                                                  |
| 261 | I74.8  | Embolism and thrombosis of other arteries                                                |
| 262 | I74.9  | Embolism and thrombosis of unspecified artery                                            |
| 263 | I77.1  | Stricture of artery                                                                      |
| 264 | I77.5  | Necrosis of artery                                                                       |
| 265 | I77.6  | Arteritis, unspecified                                                                   |
| 266 | I77.8  | Other specified disorders of arteries and arterioles                                     |
| 267 | I77.9  | Disorder of arteries and arterioles, unspecified                                         |
| 268 | I78.0  | Hereditary haemorrhagic telangiectasia                                                   |
| 269 | I78.8  | Other diseases of capillaries                                                            |
| 270 | I78.9  | Disease of capillaries, unspecified                                                      |
| 271 | I79.1* | Aortitis in diseases classified elsewhere                                                |
| 272 | I79.2* | Peripheral angiopathy in diseases classified elsewhere                                   |
| 273 | I79.8* | Other disorders of arteries, arterioles and capillaries in diseases classified elsewhere |
| 274 | I98.8* | Other specified disorders of circulatory system in diseases classified elsewhere         |
| 275 | I99    | Other and unspecified disorders of circulatory system                                    |
| 276 | K29.2  | Alcoholic gastritis                                                                      |
| 277 | K70.0  | Alcoholic fatty liver                                                                    |
| 278 | K70.1  | Alcoholic hepatitis                                                                      |
| 279 | K70.2  | Alcoholic fibrosis and sclerosis of liver                                                |
| 280 | K70.3  | Alcoholic cirrhosis of liver                                                             |
| 281 | K70.4  | Alcoholic hepatic failure                                                                |

|     |        |                                                                                             |
|-----|--------|---------------------------------------------------------------------------------------------|
| 282 | K70.9  | Alcoholic liver disease, unspecified                                                        |
| 283 | K86.0  | Alcohol-induced chronic pancreatitis                                                        |
| 284 | O10.0  | Pre-existing essential hypertension complicating pregnancy, childbirth and the puerperium   |
| 285 | O10.4  | Pre-existing secondary hypertension complicating pregnancy, childbirth and the puerperium   |
| 286 | O10.9  | Unspecified pre-existing hypertension complicating pregnancy, childbirth and the puerperium |
| 287 | O13    | Gestational [pregnancy-induced] hypertension                                                |
| 288 | O16    | Unspecified maternal hypertension                                                           |
| 289 | O24.0  | Pre-existing type 1 diabetes mellitus                                                       |
| 290 | O24.11 | Pre-existing type 2 diabetes mellitus, in pregnancy, without insulin                        |
| 291 | O24.12 | Pre-existing type 2 diabetes mellitus, in pregnancy, with insulin                           |
| 292 | O24.21 | Pre-existing diabetes mellitus in pregnancy, otherwise specified, without insuline          |
| 293 | O24.22 | Pre-existing diabetes mellitus in pregnancy, otherwise specified, withinsuline              |
| 294 | O24.31 | Unspecified pre-existing diabetes mellitus in pregnancy, without insulin                    |
| 295 | O24.32 | Unspecified pre-existing diabetes mellitus in pregnancy, with insulin                       |
| 296 | O24.41 | Gestational diabetes mellitus in pregnancy, without insulin                                 |
| 297 | O24.42 | Gestational diabetes mellitus in pregnancy, with insulin                                    |
| 298 | O24.91 | Unspecified diabetes mellitus in pregnancy, without insulin                                 |
| 299 | O24.92 | Unspecified diabetes mellitus in pregnancy, with insulin                                    |
| 300 | O26.0  | Excessive weight gain in pregnancy                                                          |
| 301 | O36.6  | Maternal care for excessive fetal growth                                                    |
| 302 | Q27.3  | Peripheral arteriovenous malformation                                                       |
| 303 | Q27.8  | Other specified congenital malformations of peripheral vascular system                      |
| 304 | Q27.9  | Congenital malformation of peripheral vascular system, unspecified                          |
| 305 | R03.0  | Elevated blood-pressure reading, without diagnosis of hypertension                          |
| 306 | R78.0  | Finding of alcohol in blood                                                                 |
| 307 | T38.3  | Poisoning, insulin and oral hypoglycaemic [antidiabetic] drugs                              |
| 308 | T46.6  | Poisoning, antihyperlipidaemic and antiarteriosclerotic drugs                               |
| 309 | T51.0  | Toxic effect, ethanol                                                                       |
| 310 | T51.9  | Toxic effect, alcohol, unspecified                                                          |
| 311 | T65.2  | Toxic effect, tobacco and nicotine                                                          |
| 312 | T82.2  | Mechanical complication of coronary artery bypass and valve grafts                          |
| 313 | T87.3  | Neuroma of amputation stump                                                                 |
| 314 | T87.4  | Infection of amputation stump                                                               |
| 315 | T87.5  | Necrosis of amputation stump                                                                |
| 316 | T87.6  | Other and unspecified complications of amputation stump                                     |
| 317 | X45    | Accidental poisoning by and exposure to alcohol                                             |
| 318 | X65    | Intentional self-poisoning by and exposure to alcohol                                       |
| 319 | Y15    | Poisoning by and exposure to alcohol, undetermined intent                                   |
| 320 | Y42.3  | Adverse effects in therapeutic use, insulin and oral hypoglycaemic [antidiabetic] drugs     |

|     |        |                                                                                                                          |
|-----|--------|--------------------------------------------------------------------------------------------------------------------------|
| 321 | Y52.6  | Adverse effects in therapeutic use, antihyperlipidaemic and antiarteriosclerotic drugs                                   |
| 322 | Y83.5  | Abnormal reaction/late complication, without mention of misadventure at the time of the procedure, amputation of limb(s) |
| 323 | Y90.0  | Blood alcohol level of less than 20 mg/100 ml                                                                            |
| 324 | Y90.1  | Blood alcohol level of 20-39 mg/100 ml                                                                                   |
| 325 | Y90.2  | Blood alcohol level of 40-59 mg/100 ml                                                                                   |
| 326 | Y90.3  | Blood alcohol level of 60-79 mg/100 ml                                                                                   |
| 327 | Y90.4  | Blood alcohol level of 80-99 mg/100 ml                                                                                   |
| 328 | Y90.5  | Blood alcohol level of 100-119 mg/100 ml                                                                                 |
| 329 | Y90.6  | Blood alcohol level of 120-199 mg/100 ml                                                                                 |
| 330 | Y90.7  | Blood alcohol level of 200-239 mg/100 ml                                                                                 |
| 331 | Y90.8  | Blood alcohol level of 240 mg/100 ml or more                                                                             |
| 332 | Y90.9  | Presence of alcohol in blood, level not specified                                                                        |
| 333 | Y91.0  | Mild alcohol intoxication                                                                                                |
| 334 | Y91.1  | Moderate alcohol intoxication                                                                                            |
| 335 | Y91.2  | Severe alcohol intoxication                                                                                              |
| 336 | Y91.3  | Very severe alcohol intoxication                                                                                         |
| 337 | Y91.9  | Alcohol involvement, not otherwise specified                                                                             |
| 338 | Z04.0  | Blood-alcohol and blood-drug test                                                                                        |
| 339 | Z50.2  | Alcohol rehabilitation                                                                                                   |
| 340 | Z71.4  | Alcohol abuse counselling and surveillance                                                                               |
| 341 | Z71.6  | Tobacco abuse counselling                                                                                                |
| 342 | Z72.0  | Tobacco use                                                                                                              |
| 343 | Z72.1  | Alcohol use                                                                                                              |
| 344 | Z81.1  | Family history of alcohol abuse                                                                                          |
| 345 | Z81.2  | Family history of tobacco abuse                                                                                          |
| 346 | Z83.3  | Family history of diabetes mellitus                                                                                      |
| 347 | Z86.41 | Personal history of drug abuse                                                                                           |
| 348 | Z86.43 | Personal history of tobacco use                                                                                          |
| 349 | Z95.1  | Presence of aortocoronary bypass graft                                                                                   |
| 350 | Z95.5  | Presence of coronary angioplasty implant and graft                                                                       |

Table S3. Amputations numbers - Comparative data in 2019: national database and 61 pool hospitals. (source 1 and 2)

| No | Name of procedure         | National data<br>- total no.<br>(%*) 2019<br>(Source 1) | 61<br>hospitals<br>pool - total<br>no. (%*)<br>2019<br>(Source 2) | %** of the<br>61 hospitals<br>pool /<br>National<br>data 2019 | p*       |
|----|---------------------------|---------------------------------------------------------|-------------------------------------------------------------------|---------------------------------------------------------------|----------|
| 1  | Amputation above the knee | 4,264 (28.5)                                            | 1,942 (29.9)                                                      | 45.8                                                          | 0.108*** |
| 2  | Amputation of toe         | 4,156 (27.8)                                            | 1,694 (26.1)                                                      | 41.3                                                          | 0.061*** |

|                                                                                                                                                                                                                                                                                                                                                 |                                                          |               |              |       |          |
|-------------------------------------------------------------------------------------------------------------------------------------------------------------------------------------------------------------------------------------------------------------------------------------------------------------------------------------------------|----------------------------------------------------------|---------------|--------------|-------|----------|
| 3                                                                                                                                                                                                                                                                                                                                               | Amputation of toe including metatarsal bone              | 2,776 (18.6)  | 1,223(18.9)  | 43.8  | 1.00     |
| 4                                                                                                                                                                                                                                                                                                                                               | Transmetatarsal amputation                               | 1246 (8.3)    | 545 (8.4)    | 45.3  | 0.380    |
| 5                                                                                                                                                                                                                                                                                                                                               | Amputation below knee                                    | 1143 (7.7)    | 508 (7.8)    | 44.2  | 1.00     |
| 6                                                                                                                                                                                                                                                                                                                                               | Reamputation of amputation stump                         | 786 (5.3)     | 308 (4.3)    | 39.3  | 0.270*** |
| 7                                                                                                                                                                                                                                                                                                                                               | Midtarsal amputation                                     | 396 (2.7)     | 199 (3.1)    | 50.3  | 0.135    |
| 8                                                                                                                                                                                                                                                                                                                                               | Amputation at hip                                        | 142 (1.0)     | 60 (0.9)     | 42.3  | 0.417    |
| 9                                                                                                                                                                                                                                                                                                                                               | Amputation of ankle through malleoli of tibia and fibula | 29 (0.2)      | 12 (0.2)     | 41.4  | 1.00     |
| <b>Total</b>                                                                                                                                                                                                                                                                                                                                    |                                                          | <b>14,938</b> | <b>6,488</b> | 43.73 |          |
| <p>*percent from the total on the column<br/> ** percent from the total on the line<br/> *** with Bonferroni correction<br/> + p for one proportion test (H0: proportion of th amputations reported on the code on 61 pool of hospitals did not differ statistically from the proportion in the population national data)<br/> No. - number</p> |                                                          |               |              |       |          |

Table S4. Number of amputations from the national database (source 1) by DRG code, and year

| No.          | Name of procedure                                        | National data 2016 | National data 2017 | National data 2018 | National data 2019 | National data 2020 | National data 2021 |
|--------------|----------------------------------------------------------|--------------------|--------------------|--------------------|--------------------|--------------------|--------------------|
| 1            | Amputation above the knee                                | 4,259              | 4,277              | 4,407              | 4,264              | 4,223              | 4,490              |
| 2            | Amputation of toe                                        | 3,738              | 3,987              | 3,834              | 4,156              | 3,113              | 3,428              |
| 3            | Amputation of toe including metatarsal bone              | 2,513              | 2,568              | 2,625              | 2,776              | 2,292              | 2,574              |
| 4            | Transmetatarsal amputation                               | 944                | 1,219              | 1,224              | 1,246              | 1,158              | 1,313              |
| 5            | Amputation below knee                                    | 983                | 1,020              | 982                | 1,143              | 1,009              | 1,063              |
| 6            | Reamputation of amputation stump                         | 795                | 807                | 783                | 786                | 675                | 663                |
| 7            | Midtarsal amputation                                     | 384                | 401                | 352                | 396                | 335                | 361                |
| 8            | Amputation at hip                                        | 132                | 107                | 142                | 142                | 93                 | 96                 |
| 9            | Amputation of ankle through malleoli of tibia and fibula | 32                 | 23                 | 34                 | 29                 | 26                 | 36                 |
| <b>Total</b> |                                                          | <b>13,780</b>      | <b>14,409</b>      | <b>14,383</b>      | <b>14,938</b>      | <b>12,924</b>      | <b>14,024</b>      |

Table S5. – Number of revascularizations (source 1) by DRG code per years

| No. | Name of the procedure                                                        | National data 2016 | National data 2017 | National Data 2018 | National Data 2019 | National data 2020 | National data 2021 |
|-----|------------------------------------------------------------------------------|--------------------|--------------------|--------------------|--------------------|--------------------|--------------------|
| 1   | Percutaneous transluminal balloon angioplasty with stenting, single stent    | 2,304              | 2,497              | 2,876              | 3,113              | 2,744              | 4,075              |
| 2   | Percutaneous transluminal balloon angioplasty with stenting, multiple stents | 876                | 927                | 1,174              | 1,536              | 1,290              | 2,009              |
| 3   | Percutaneous transluminal balloon angioplasty                                | 2,119              | 2,642              | 2,493              | 3,377              | 1,988              | 2,377              |
| 4   | Embolectomy or thrombectomy of femoral artery                                | 1,162              | 1,047              | 1,137              | 1,120              | 829                | 1,101              |
| 5   | Embolectomy or thrombectomy of popliteal artery                              | 875                | 791                | 884                | 833                | 594                | 821                |

|                                      |                                                                                      |               |               |               |               |               |               |
|--------------------------------------|--------------------------------------------------------------------------------------|---------------|---------------|---------------|---------------|---------------|---------------|
| 6                                    | Patch graft of artery using synthetic material                                       | 505           | 531           | 602           | 653           | 447           | 552           |
| 7                                    | Femoro-popliteal bypass using synthetic material, above knee anastomosis             | 475           | 487           | 531           | 483           | 312           | 386           |
| 8                                    | Embolectomy or thrombectomy of iliac artery                                          | 443           | 401           | 426           | 411           | 322           | 424           |
| 9                                    | Embolectomy or thrombectomy of tibial artery                                         | 352           | 340           | 373           | 387           | 298           | 395           |
| 10                                   | Patch graft of artery using autologous material                                      | 401           | 406           | 373           | 409           | 315           | 463           |
| 11                                   | Embolectomy or thrombectomy of bypass graft of artery of extremities                 | 164           | 187           | 217           | 204           | 160           | 184           |
| 12                                   | Procurement of vein from limb for bypass or replacement graft                        | 512           | 439           | 498           | 608           | 549           | 696           |
| 13                                   | Embolectomy or thrombectomy of other artery                                          | 245           | 251           | 243           | 279           | 286           | 449           |
| 14                                   | Aorto-femoro-femoral bypass using synthetic material                                 | 224           | 235           | 226           | 200           | 142           | 180           |
| 15                                   | Femoro-popliteal bypass using synthetic material, below knee anastomosis, unilateral | 196           | 183           | 212           | 192           | 189           | 201           |
| 16                                   |                                                                                      | 1,925         | 1,909         | 2,140         | 1,942         | 1,566         | 1,862         |
| <b>Total</b>                         |                                                                                      | <b>12,778</b> | <b>13,273</b> | <b>14,405</b> | <b>15,747</b> | <b>12,031</b> | <b>16,175</b> |
| <b>Total open procedures</b>         |                                                                                      | <b>7,454</b>  | <b>7,195</b>  | <b>7,842</b>  | <b>7,698</b>  | <b>5,982</b>  | <b>7,691</b>  |
| <b>Total endovascular procedures</b> |                                                                                      | <b>5,324</b>  | <b>6,078</b>  | <b>6,563</b>  | <b>8,049</b>  | <b>6,049</b>  | <b>8,484</b>  |

Table S6 Revascularisation numbers - Comparative data in 2019: national database and 61 pool hospitals (source 1 and 2)

| No. | Name of the procedure                                                        | National Data - Total no. (*%) 2019 (Source 1) | 61 hospitals pool - Total no. (*%) 2019 (Source 2) | ***% 61 hospitals pool / National data 2019 | p <sup>+</sup> |
|-----|------------------------------------------------------------------------------|------------------------------------------------|----------------------------------------------------|---------------------------------------------|----------------|
| 1   | Percutaneous transluminal balloon angioplasty with stenting, single stent    | 3,113 (19.8)                                   | 1,707 (25.4)                                       | 54.83                                       | <0.001***      |
| 2   | Percutaneous transluminal balloon angioplasty with stenting, multiple stents | 1,536 (9.8)                                    | 964 (14.4)                                         | 62.76                                       | <0.001***      |
| 3   | Percutaneous transluminal balloon angioplasty                                | 3,377 (21.4)                                   | 696 (10.4)                                         | 20.61                                       | <0.001***      |
| 4   | Embolectomy or thrombectomy of femoral artery                                | 1,120 (7.1)                                    | 536 (8)                                            | 47.86                                       | 0.064***       |
| 5   | Embolectomy or thrombectomy of popliteal artery                              | 833 (5.3)                                      | 415 (6.2)                                          | 49.82                                       | 0.016***       |
| 6   | Patch angioplasty of artery using synthetic material                         | 653 (4.1)                                      | 307 (4.6)                                          | 47.01                                       | 0.624          |
| 7   | Femoro-popliteal bypass using synthetic material, above knee anastomosis     | 483 (3.1)                                      | 226 (3.4)                                          | 46.79                                       | 0.175          |
| 8   | Embolectomy or thrombectomy of iliac artery                                  | 411 (2.6)                                      | 216 (3.2)                                          | 52.55                                       | 0.032***       |
| 9   | Embolectomy or thrombectomy of posterior tibial artery                       | 387 (2.5)                                      | 143 (2.1)                                          | 36.95                                       | 0.576          |
| 10  | Patch angioplasty of artery using autologous material                        | 409 (2.6)                                      | 138 (2.1)                                          | 33.74                                       | 0.16           |
| 11  | Embolectomy or thrombectomy of bypass graft of artery of extremities         | 204 (1.3)                                      | 117 (1.7)                                          | 57.35                                       | 0.048***       |
| 12  | Procurement of vein from limb for bypass or replacement graft                | 608 (3.9)                                      | 115 (1.7)                                          | 18.91                                       | <0.001***      |

|                                                                                                                                                                                                                                                                                                                                                                                      |                                                                                      |                 |               |              |          |
|--------------------------------------------------------------------------------------------------------------------------------------------------------------------------------------------------------------------------------------------------------------------------------------------------------------------------------------------------------------------------------------|--------------------------------------------------------------------------------------|-----------------|---------------|--------------|----------|
| 13                                                                                                                                                                                                                                                                                                                                                                                   | Embolectomy or thrombectomy of other artery                                          | 279<br>(1.8)    | 103<br>(1.5)  | 36.92        | 0.064*** |
| 14                                                                                                                                                                                                                                                                                                                                                                                   | Aorto-femoro-femoral bypass using synthetic material                                 | 200<br>(1.3)    | 102<br>(1.5)  | 51.00        | 0.148    |
| 15                                                                                                                                                                                                                                                                                                                                                                                   | Femoro-popliteal bypass using synthetic material, below knee anastomosis, unilateral | 192<br>(1.2)    | 99 (1.5)      | 51.56        | 0.384    |
| 16                                                                                                                                                                                                                                                                                                                                                                                   |                                                                                      | 1,942<br>(12.3) | 831<br>(12.4) | 42.79        | 0.803    |
| <b>Total</b>                                                                                                                                                                                                                                                                                                                                                                         |                                                                                      | <b>15,747</b>   | <b>6,715</b>  | <b>42.64</b> |          |
| <p>*percent from the total on the column</p> <p>** percent from the total number of cases from National Data 2019 (Source 1)</p> <p>*** with Bonferroni correction</p> <p>+ p for one proportion test (H0: proportion of the vascular reported on the code on 61 pool of hospitals did not differ statistically significant from the proportion in the population national data)</p> |                                                                                      |                 |               |              |          |

Table S7. – Risk factors – age distribution at people with amputations – extracted from the 61 hospital pool (source2)

| Risk factor/age group   | under 30 years<br>(n=15) | 30-39 years<br>(n=52) | 40-49 years<br>(n=302) | 50-59 years<br>(n=951) | 60-69 years<br>(n=2129) | 70-79 years<br>(n=1593) | 80 and above<br>(n=943) | Arithmetic mean± standard deviation % |
|-------------------------|--------------------------|-----------------------|------------------------|------------------------|-------------------------|-------------------------|-------------------------|---------------------------------------|
| PAD and DM              | 0 (0)                    | 14 (26.9)             | 97 (32.1)              | 412 (43.3)             | 1052 (49.4)             | 736 (46.2)              | 313 (33.2)              | 33.02±16.72                           |
| PAD without DM          | 9 (60)                   | 15 (28.8)             | 71 (23.5)              | 216 (22.7)             | 545 (25.6)              | 518 (32.5)              | 483 (51.2)              | 34.91±14.74                           |
| PAD                     | 9 (60)                   | 29 (55.8)             | 168 (55.6)             | 628 (66)               | 1597 (75)               | 1254 (78.7)             | 796 (84.4)              | 67.94±11.57                           |
| DM without PAD          | 0 (6.7)                  | 4 (19.2)              | 8 (23.8)               | 47 (24.3)              | 110 (18.7)              | 77 (13.9)               | 38 (7.4)                | 16.3±7.22                             |
| DM with gangrene /ulcer | 0 (0)                    | 11 (21.2)             | 76 (25.2)              | 319 (33.5)             | 780 (36.6)              | 545 (34.2)              | 205 (21.7)              | 24.64±12.54                           |
| DM                      | 1 (6.7)                  | 10 (46.2)             | 72 (56)                | 231 (67.6)             | 399 (68.2)              | 222 (60.1)              | 70 (40.6)               | 49.33±21.43                           |
| Revascularization       | 1 (0)                    | 24 (7.7)              | 169 (2.6)              | 643 (4.9)              | 1451 (5.2)              | 958 (4.8)               | 383 (4)                 | 4.19±2.39                             |
| Hypertension            | 1 (6.7)                  | 8 (15.4)              | 80 (26.5)              | 413 (43.4)             | 1210 (56.8)             | 941 (59.1)              | 546 (57.9)              | 37.97±21.79                           |
| Ischemic stroke         | 0 (0)                    | 3 (5.8)               | 3 (1)                  | 62 (6.5)               | 226 (10.6)              | 219 (13.7)              | 133 (14.1)              | 7.39±5.7                              |
| Hyperlipidemia          | 0 (0)                    | 4 (7.7)               | 21 (7)                 | 76 (8)                 | 192 (9)                 | 148 (9.3)               | 49 (5.2)                | 6.59±3.21                             |
| Obesity                 | 1 (6.7)                  | 7 (13.5)              | 30 (9.9)               | 121 (12.7)             | 283 (13.3)              | 169 (10.6)              | 57 (6)                  | 10.39±3.06                            |
| Smoking                 | 1 (6.7)                  | 29 (55.8)             | 168 (55.6)             | 628 (66)               | 1597 (75)               | 1254 (78.7)             | 796 (84.4)              | 60.32±26.11                           |

|            |       |         |          |          |          |          |         |          |
|------------|-------|---------|----------|----------|----------|----------|---------|----------|
| Alcoholism | 0 (0) | 3 (5.8) | 13 (4.3) | 39 (4.1) | 74 (3.5) | 34 (2.1) | 5 (0.5) | 2.9±2.11 |
|------------|-------|---------|----------|----------|----------|----------|---------|----------|

| Risk factor/age group                | under 30 years (n=15) | 30 - 34 years (n=20) | 35 - 39 years (n=32) | 40 - 44 years (n=84) | 45 - 49 years (n=218) | 50 - 54 years (n=409) | 55 - 59 years (n=542) | 60 - 64 years (n=981) | 65 - 69 years (n=1148) | 70 - 74 years (n=903) | 75 - 79 years (n=690) | 80 - 84 years (n=560) | 85 and above (n=383) | media | Devia tia stand ard |
|--------------------------------------|-----------------------|----------------------|----------------------|----------------------|-----------------------|-----------------------|-----------------------|-----------------------|------------------------|-----------------------|-----------------------|-----------------------|----------------------|-------|---------------------|
| Smoking (n=404)                      | 1                     | 4                    | 4                    | 12                   | 25                    | 48                    | 45                    | 86                    | 100                    | 39                    | 23                    | 14                    | 3                    | 61.95 | 10.72               |
| Hyperlipid emia (n=490)              | 0                     | 2                    | 2                    | 7                    | 14                    | 26                    | 50                    | 87                    | 105                    | 87                    | 61                    | 30                    | 19                   | 67    | 10.06               |
| Diebetes Mellitus (3629)             | 1                     | 8                    | 16                   | 48                   | 121                   | 269                   | 374                   | 669                   | 782                    | 582                   | 376                   | 268                   | 115                  | 66.12 | 10.46               |
| PAD (n=4481)                         | 9                     | 14                   | 15                   | 47                   | 121                   | 249                   | 379                   | 713                   | 884                    | 707                   | 547                   | 470                   | 326                  | 68.29 | 11.53               |
| Revascula rization (n=284)           | 0                     | 2                    | 2                    | 0                    | 8                     | 20                    | 27                    | 52                    | 58                     | 47                    | 30                    | 29                    | 9                    | 67    | 10.47               |
| DM si Gangrene /ulcer (n=1936?) 1005 | 0                     | 5                    | 6                    | 22                   | 54                    | 133                   | 186                   | 359                   | 421                    | 332                   | 213                   | 154                   | 51                   | 66    | 10,47               |
| PAD si Diabet (2624)                 | 0                     | 6                    | 8                    | 31                   | 66                    | 161                   | 251                   | 462                   | 590                    | 449                   | 287                   | 219                   | 94                   | 67.01 | 10.37               |
| Hypertensi on (n=3199)               | 1                     | 3                    | 5                    | 13                   | 67                    | 159                   | 254                   | 551                   | 659                    | 531                   | 410                   | 333                   | 213                  | 69    | 10.10               |
| Ischemic Stroke (n=646)              | 0                     | 0                    | 3                    | 1                    | 2                     | 21                    | 41                    | 107                   | 119                    | 116                   | 103                   | 78                    | 55                   | 71    | 9.38                |
| Coronary Disease (n=107)             | 0                     | 0                    | 0                    | 1                    | 1                     | 8                     | 6                     | 24                    | 17                     | 19                    | 15                    | 13                    | 3                    | 68    | 9.6                 |
| Carotid Disease (n=90)               | 0                     | 0                    | 0                    | 0                    | 0                     | 3                     | 6                     | 18                    | 17                     | 24                    | 11                    | 8                     | 3                    | 69    | 8.32                |
| Obesity (n=668)                      | 1                     | 2                    | 5                    | 5                    | 25                    | 48                    | 73                    | 123                   | 160                    | 112                   | 57                    | 42                    | 15                   | 66    | 9.98                |
| Alcoholism (n=168)                   | 0                     | 1                    | 2                    | 4                    | 9                     | 19                    | 20                    | 35                    | 39                     | 21                    | 13                    | 2                     | 3                    | 63    | 10.24               |

Table S8. – Discharge ward (source 2) for people with amputations in 2019

| No. | Discharge clinic | No. of amputations | % of total, 95% CI |
|-----|------------------|--------------------|--------------------|
| 1   | General Surgery  | 4,327              | 72.3 (71.2; 73.4)  |
| 2   | Vascular Surgery | 1,143              | 19.1 (18.1; 20.1)  |

|                                               |                                    |              |                |
|-----------------------------------------------|------------------------------------|--------------|----------------|
| 3                                             | Plastic and Reconstructive Surgery | 161          | 2.7 (2.3; 3.1) |
| 4                                             | Cardiovascular Surgery             | 101          | 1.7 (1.4; 2)   |
| 5                                             | Orthopedy and Traumatology         | 92           | 1.5 (1.2; 1.8) |
| 6                                             | Osteo-articular TBC                | 21           | 0.4 (0.2; 0.6) |
| 7                                             | Internal Medicine                  | 20           | 0.3 (0.2; 0.4) |
| 8                                             | Cardiology                         | 16           | 0.3 (0.2; 0.4) |
| 9                                             | Gynecology                         | 15           | 0.3 (0.2; 0.4) |
| 10                                            | Neurology                          | 10           | 0.2 (0.1; 0.3) |
| 11                                            | Acute Psychiatry                   | 10           | 0.2 (0.1; 0.3) |
| 12                                            | Infectious Diseases                | 9            | 0.2 (0.1; 0.3) |
| 13                                            | Burns                              | 9            | 0.2 (0.1; 0.3) |
| 14                                            | Dermatology                        | 8            | 0.1 (0; 0.2)   |
| 15                                            | Diabetology                        | 7            | 0.1 (0; 0.2)   |
| 16                                            | Other                              | 106          | 1.8 (1.5; 2.1) |
| <b>Total</b>                                  |                                    | <b>5,985</b> | <b>100</b>     |
| <b>No. – number; CI – Confidence interval</b> |                                    |              |                |

Table S9. – Surgeon specialty realizing the amputation procedure (source 2) for people with amputations in 2019

| <b>No.</b>                                    | <b>Specialty of surgeon</b> | <b>No. of amputations</b> | <b>% of total, 95% CI</b> |
|-----------------------------------------------|-----------------------------|---------------------------|---------------------------|
| 1                                             | General Surgeon             | 4,374                     | 73.1 (72; 74.2)           |
| 2                                             | Vascular Surgeon            | 1,042                     | 17.4 (16.4; 18.4)         |
| 3                                             | Plastic Surgeon             | 206                       | 3.4 (2.9; 3.9)            |
| 4                                             | Cardiovascular surgeon      | 119                       | 2 (1.6; 2.4)              |
| 5                                             | Orthopedic                  | 96                        | 1.6 (1.3; 1.9)            |
| 6                                             | No medical doctor           | 87                        | 1.5 (1.2; 1.8)            |
| 7                                             | Thoracic Surgery            | 20                        | 0.3 (0.2; 0.4)            |
| 8                                             | Anesthesiology              | 19                        | 0.3 (0.2; 0.4)            |
| 9                                             | Cardiology                  | 11                        | 0.9 (0.7; 1.1)            |
| 10                                            | Emergency Internal Medicine | 3                         | 0.1 (0; 0.2)              |
| 11                                            | General Pharmacy            | 2                         | 0.03 (0; 0.1)             |
| 12                                            | Internal Medicine           | 2                         | 0.03 (0; 0.1)             |
| 13                                            | Dermatology                 | 1                         | 0.02 (0; 0.1)             |
| 14                                            | Diabetologist               | 1                         | 0.02 (0; 0.1)             |
| 15                                            | Neurosurgeon                | 1                         | 0.02 (0; 0.1)             |
| 16                                            | Gynecologist                | 1                         | 0.02 (0; 0.1)             |
| <b>Total</b>                                  |                             | <b>5,985</b>              |                           |
| <b>No. – number; CI – Confidence interval</b> |                             |                           |                           |



Table S10 (Source 2) **Intra-hospital mortality in people with amputations**

| <b>No.</b>                                                        | <b>Age group (years)</b> | <b>No. of discarded cases 2019</b> | <b>p compare to 18-49 years age group</b> | <b>RR, 95% CI compare to 18-49 years age group</b> |
|-------------------------------------------------------------------|--------------------------|------------------------------------|-------------------------------------------|----------------------------------------------------|
| <b>1</b>                                                          | 18 - 49 (n=369)          | 18 (4.9)                           | -                                         | -                                                  |
| <b>2</b>                                                          | 50 - 54 (n=409)          | 18 (4.4)                           | 0.752                                     | -                                                  |
| <b>3</b>                                                          | 55 - 59 (n=542)          | 29 (5.4)                           | 0.752                                     | -                                                  |
| <b>4</b>                                                          | 60 – 64 (n=981)          | 68 (6.9)                           | 0.169                                     | -                                                  |
| <b>5</b>                                                          | 65 - 69 (n=1148)         | 117 (10.2)                         | 0.002                                     | 2.09 (1.29; 3.38)                                  |
| <b>6</b>                                                          | 70 – 74 (n=903)          | 113 (12.5)                         | <0.001                                    | 2.57 (1.58; 4.16)                                  |
| <b>7</b>                                                          | 75 - 79 (n=690)          | 85 (12.3)                          | <0.001                                    | 2.53 (1.54; 4.75)                                  |
| <b>8</b>                                                          | 80 – 84 (n=560)          | 88 (15.7)                          | <0.001                                    | 3.22 (1.97; 5.26)                                  |
| <b>9</b>                                                          | 85 > (n=383)             | 74 (19.3)                          | <0.001                                    | 3.96 (2.41; 6.5)                                   |
| <b>Total</b>                                                      |                          | 610 (10.2)                         |                                           |                                                    |
| <b>NO. – NUMBER; RR – RELATIVE RISK; CI – CONFIDENCE INTERVAL</b> |                          |                                    |                                           |                                                    |
